# Supplementary material for: The Lewis superacid Al[N(C6F5)2]3 and its higher homolog Ga[N(C6F5)2]3 – structural features, theoretical investigation and reactions of a metal amide with higher fluoride ion affinity than SbF5
Source: PubMed Central journal article supplement (PMC5869307; doi:10.1039/c7sc03988c), 2017-10-23
Supplement: SC-009-C7SC03988C-s001.pdf [file SC-009-C7SC03988C-s001.pdf]

## Supporting Information

### **The New Lewis Superacid Al[N(C<sub>6</sub>F<sub>5</sub>)<sub>2</sub>]<sub>3</sub> and its Higher Homolog Ga[N(C<sub>6</sub>F<sub>5</sub>)<sub>2</sub>]<sub>3</sub> - Structural Features, Theoretical Investigation and Reactions of a Metal Amide with Higher Fluoride Ion Affinity than SbF<sub>5</sub>**

Julius F. Kögel, Denis A. Sorokin, Alexander Khvorost, Martin Scott, Klaus Harms, Daniel Himmel,  
Ingo Krossing, Jörg Sundermeyer\*

#### **Table of Contents**

|                              |     |
|------------------------------|-----|
| Synthetic Procedures         | S2  |
| Crystallographic Information | S6  |
| Quantumchemical Calculations | S9  |
| References                   | S23 |

## Synthetic Procedures

All reactions were carried out under inert atmosphere using standard Schlenk techniques. Moisture and air sensitive substances were stored in a conventional nitrogen-flushed glovebox. Solvents were purified according to literature procedures and kept under an inert atmosphere.  $\text{HN}(\text{C}_6\text{F}_5)_2$  was prepared from the reaction of hexafluorobenzene with lithium amide<sup>1</sup> and deprotonated with *n*-butyllithium to obtain  $\text{LiN}(\text{C}_6\text{F}_5)_2$ .<sup>2</sup> Commercially available aluminum trichloride was sublimed prior to use.

Spectra were recorded on the following spectrometers: NMR: BRUKER ARX300, BRUKER DRX400, BRUKER, DRX500; IR: ATR-FT-IR; MS: LTQ-FT or QStarPulsar i (FINNIGAN); elemental analysis: CHN-Rapid (HERAEUS).

**Preparation of  $\text{Al}[\text{N}(\text{C}_6\text{F}_5)_2]_3$ :** A solution of *n*-butyllithium (1.6 M, 8.0 mL, 12.8 mmol, 3.1 eq.) in hexane was added dropwise over 1 min to a solution of  $\text{HN}(\text{C}_6\text{F}_5)_2$  (4.48 g, 12.8 mmol, 3.1 eq.) in toluene (45 mL) at  $-50\text{ }^\circ\text{C}$ . The formed suspension of  $\text{LiN}(\text{C}_6\text{F}_5)_2$  was stirred for 20 min at  $-50\text{ }^\circ\text{C}$  and a suspension of finely pesteled aluminum trichloride (0.55 g, 4.1 mmol) in toluene (20 mL) was added. The reaction mixture was allowed to reach room temperature and stirred for 18 h at  $75\text{ }^\circ\text{C}$ . The hot suspension was filtered and large colorless crystals grew from the filtrate after 12 h at room temperature. The crystals were separated from the supernatant by decantation, recrystallized from toluene, washed with pentane and dried *in vacuo* to give  $\text{Al}[\text{N}(\text{C}_6\text{F}_5)_2]_3$  (2.06 g, 1.9 mmol, 47%) as a white solid. The yield strongly depends on the grain size of the used  $\text{AlCl}_3$ . Single crystals suitable for structure determination were obtained by layering a saturated solution in toluene with pentane at  $-30\text{ }^\circ\text{C}$ .

M. p.  $167.8\text{ }^\circ\text{C}$  (decomposition);  $^{13}\text{C}$  NMR (101 MHz,  $[\text{D}_6]$ benzene,  $25\text{ }^\circ\text{C}$ , TMS):  $\delta=143.8$  (dm,  $^1J(\text{C},\text{F}) = 240.2$  Hz, *o*- $\text{C}_{\text{Ar}}$ ),  $138.3$  (dm,  $^1J(\text{C},\text{F}) = 255.4$  Hz, *p*- $\text{C}_{\text{Ar}}$ ),  $137.8$  (dm,  $^1J(\text{C},\text{F}) = 241.2$  Hz, *m*- $\text{C}_{\text{Ar}}$ ),  $120.7$  ppm (s, *ipso*- $\text{C}_{\text{Ar}}$ );  $^{19}\text{F}$  NMR (188.2 MHz,  $[\text{D}_6]$ benzene,  $25\text{ }^\circ\text{C}$ ,  $\text{CFCl}_3$ ):  $\delta=-153.1$  (d,  $^3J(\text{F},\text{F}) = 20$  Hz,  $12\text{F}$ , *o*-F),  $-158.6$  (t,  $^3J(\text{F},\text{F}) = 21$  Hz,  $6\text{F}$ , *p*-F),  $-161.1$  ppm (t,  $^3J(\text{F},\text{F}) = 21$  Hz,  $12\text{F}$ , *m*-F); IR:  $\tilde{\nu}=440$  (m),  $453$  (w),  $507$  (w),  $619$  (w),  $638$  (w),  $683$  (m),  $764$  (m),  $802$  (br m),  $990$  (s),  $1030$  (br s),  $1096$  (br m),  $1182$  (w),  $1211$  (m),  $1507$  (s),  $1520$  (s)  $\text{cm}^{-1}$ ; elemental analysis calcd (%) for  $\text{C}_{36}\text{AlF}_{30}\text{N}_3$ : C 40.36, N 3.92; found: C 39.48, N 3.73.

$\text{Al}[\text{N}(\text{C}_6\text{F}_5)_2]_3$  can also be prepared from the reaction of  $\text{AlMe}_3$  with  $\text{HN}(\text{C}_6\text{F}_5)_2$ :  $\text{AlMe}_3$  (0.21 g, 3.10 mmol, 1.0 eq.) was added dropwise to a solution of  $\text{HN}(\text{C}_6\text{F}_5)_2$  (3.10 g, 8.89 mmol, 3.0 eq.) in *o*-xylene (25 mL) and the reaction mixture was stirred for 90 h at  $130\text{ }^\circ\text{C}$ . After allowing the solution to reach room temperature, big brownish crystals precipitated. They were separated from the supernatant, recrystallized from toluene and dried *in vacuo* to give  $\text{Al}[\text{N}(\text{C}_6\text{F}_5)_2]_3$  (0.31 g, 0.29 mmol, 9%) as a white solid.

The reaction of  $\text{Al}[\text{N}(\text{SiMe}_3)_2]_3$  with  $\text{HN}(\text{C}_6\text{F}_5)_2$  in toluene at  $90\text{ }^\circ\text{C}$  did not yield the desired  $\text{Al}[\text{N}(\text{C}_6\text{F}_5)_2]_3$ .

**Preparation of [Cs(Tol)<sub>3</sub>]<sup>+</sup>[FAl(N(C<sub>6</sub>F<sub>5</sub>)<sub>2</sub>)<sub>3</sub>]<sup>-</sup>:** Al[N(C<sub>6</sub>F<sub>5</sub>)<sub>2</sub>]<sub>3</sub> (0.360 g, 0.33 mmol, 1.0 eq.) and cesium fluoride (0.102 g, 0.66 mmol, 2.0 eq.) were suspended in toluene (10 mL) and the reaction mixture was stirred for 20 h at 100 °C. The hot solution was filtered to separate remaining CsF and the filtrate was cooled to room temperature and set aside for crystallization. Colorless crystals formed that were separated from the supernatant by filtration, washed with pentane and dried in the argon stream to yield [Cs(Tol)<sub>3</sub>]<sup>+</sup>[FAl(N(C<sub>6</sub>F<sub>5</sub>)<sub>2</sub>)<sub>3</sub>]<sup>-</sup> (0.330 g, 0.22 mmol, 67%) as a white crystalline solid.

M. p. 124.7 °C; <sup>1</sup>H NMR (200 MHz, [D<sub>6</sub>]benzene, 25 °C, TMS): δ=6.98-7.17 (m, 15H, C<sub>6</sub>H<sub>5</sub>), 2.10 ppm (s, 9H, CH<sub>3</sub>); <sup>19</sup>F-NMR (188 MHz, [D<sub>6</sub>]benzene, 25 °C, CFCl<sub>3</sub>): δ=-150.4 (br s, 12F, *o*-F), -157.4 (br s, 1F, Al-F), -164.0 (t, <sup>3</sup>J(F,F) = 20 Hz, 6F, *p*-F), -166.3 ppm (t, <sup>3</sup>J(F,F) = 22 Hz, 12F, *m*-F); elemental analysis calcd (%) for C<sub>57</sub>H<sub>24</sub>AlCsF<sub>31</sub>N<sub>3</sub>: C 45.65, H 1.61, N 2.80; found: C 44.89, H 1.68, N 2.76.

**Preparation of [CPh<sub>3</sub>]<sup>+</sup>[FAl(N(C<sub>6</sub>F<sub>5</sub>)<sub>2</sub>)<sub>3</sub>]<sup>-</sup>:** A solution of [Ph<sub>3</sub>C]<sup>+</sup>[BF<sub>4</sub>]<sup>-</sup> (0.31 g, 0.94 mmol, 1.0 eq.) in dichloromethane (10 mL) was added dropwise to a suspension of Al[N(C<sub>6</sub>F<sub>5</sub>)<sub>2</sub>]<sub>3</sub> (1.00 g, 0.94 mmol, 1.0 eq.) in toluene (30 mL). The reaction mixture changed color to red. A pH indicator paper in the argon stream of the reaction mixture changes color to red indicating the formation of BF<sub>3</sub>. All volatiles were removed *in vacuo* and the residue was suspended in toluene (20 mL) and filtrated. Hexane (30 mL) was added to the filtrate leading to the precipitation of a yellow solid. It was filtered off, washed with pentane and dried *in vacuo*. It decomposes after 24 h, but is stable for at least three days in toluene solution. A NMR spectroscopically identical compound could be obtained directly from the reaction between Al[N(C<sub>6</sub>F<sub>5</sub>)<sub>2</sub>]<sub>3</sub> and trityl fluoride in C<sub>6</sub>D<sub>6</sub>. <sup>1</sup>H NMR (200 MHz, [D<sub>6</sub>]benzene, 25 °C, TMS): δ=7.38 (t, <sup>3</sup>J(H,H) = 7.5 Hz, 3H, C<sub>6</sub>H<sub>5</sub>), 7.08 (t, <sup>3</sup>J(H,H) = 7.8 Hz, 6H, C<sub>6</sub>H<sub>5</sub>), 6.78 ppm (d, <sup>3</sup>J(H,H) = 7.5 Hz, 6H, C<sub>6</sub>H<sub>5</sub>); <sup>19</sup>F NMR (188 MHz, [D<sub>6</sub>]benzene, 25 °C, CFCl<sub>3</sub>): δ=-148.8 (d, <sup>3</sup>J(F,F) = 22 Hz, 12F, *o*-F), -164.8 (t, <sup>3</sup>J(F,F) = 22 Hz, 6F, *p*-F), -166.3 (t, <sup>3</sup>J(F,F) = 21 Hz, 12F, *m*-F), -170.8 ppm (br s, 1F, Al-F).

**Reaction of Al[N(C<sub>6</sub>F<sub>5</sub>)<sub>2</sub>]<sub>3</sub> with [Ph<sub>4</sub>P]<sup>+</sup>[SbF<sub>6</sub>]<sup>-</sup>:** A solution of [Ph<sub>4</sub>P]<sup>+</sup>[SbF<sub>6</sub>]<sup>-</sup> (75 mg, 0.13 mmol, 1.0 eq.) in toluene (1 mL) was added dropwise to a suspension of Al[N(C<sub>6</sub>F<sub>5</sub>)<sub>2</sub>]<sub>3</sub> (140 mg, 0.13 mmol, 1.0 eq.) in toluene (2 mL). The reaction mixture was slowly heated under dissolution of Al[N(C<sub>6</sub>F<sub>5</sub>)<sub>2</sub>]<sub>3</sub>. A color change to yellow was observed at 100 °C and a white precipitate was formed. It was separated by filtration and dried *in vacuo*. A <sup>19</sup>F NMR spectrum was measured: <sup>19</sup>F NMR (188 MHz, [D<sub>6</sub>]benzene, 25 °C, CFCl<sub>3</sub>): δ=-149.6 ppm (br s, <sup>3</sup>J(F,F) = 22 Hz, 12F, *o*-F), -166.2 (t, <sup>3</sup>J(F,F) = 22 Hz, 6F, *p*-F), -167.5 (t, <sup>3</sup>J(F,F) = 21 Hz, 12F, *m*-F), -172.3 (br s, 1F, Al-F).

**Reaction of Al[N(C<sub>6</sub>F<sub>5</sub>)<sub>2</sub>]<sub>3</sub> with [Ph<sub>3</sub>C]<sup>+</sup>[FB(C<sub>6</sub>F<sub>5</sub>)<sub>3</sub>]<sup>-</sup>:** [Ph<sub>3</sub>C]<sup>+</sup>[FB(C<sub>6</sub>F<sub>5</sub>)<sub>3</sub>]<sup>-</sup> (10 mg, 0.013 mmol, 1 eq.) was added to a solution of Al[N(C<sub>6</sub>F<sub>5</sub>)<sub>2</sub>]<sub>3</sub> (15 mg, 0.014 mmol, 1.1 eq.) in [D<sub>6</sub>]benzene (0.7 mL). The yellow reaction mixture was heated to 80 °C and changed color to yellowish brown under dissolution of Al[N(C<sub>6</sub>F<sub>5</sub>)<sub>2</sub>]<sub>3</sub>. The <sup>19</sup>F NMR spectrum revealed the signals of B(C<sub>6</sub>F<sub>5</sub>)<sub>3</sub>, [FAl(N(C<sub>6</sub>F<sub>5</sub>)<sub>2</sub>)<sub>3</sub>]<sup>-</sup> and excess

Al[N(C<sub>6</sub>F<sub>5</sub>)<sub>2</sub>]<sub>3</sub>. <sup>19</sup>F NMR (188 MHz, [D<sub>6</sub>]benzene, 25 °C, CFCl<sub>3</sub>): [FAl(N(C<sub>6</sub>F<sub>5</sub>)<sub>2</sub>)<sub>3</sub>]<sup>-</sup>: δ=-170.8 (br s, 1F, Al-F), -166.3 (t, <sup>3</sup>J(F,F) = 21 Hz, 12F, *m*-F), -164.8 (t, <sup>3</sup>J(F,F) = 22 Hz, 6F, *p*-F), -148.8 ppm (d, <sup>3</sup>J(F,F) = 22 Hz, 12F, *o*-F); B(C<sub>6</sub>F<sub>5</sub>)<sub>3</sub>: δ=-160.3 (t, <sup>3</sup>J(F,F) = 22 Hz, 6F, *m*-F), -141.8 (t, <sup>3</sup>J(F,F) = 20 Hz, 3F, *p*-F), -129.1 ppm (d, <sup>3</sup>J(F,F) = 22 Hz, 6F, *o*-F).

**Reaction of Al[N(C<sub>6</sub>F<sub>5</sub>)<sub>2</sub>]<sub>3</sub> with F<sub>2</sub>CIC-CCl<sub>2</sub>F:** F<sub>2</sub>CIC-CCl<sub>2</sub>F (2 mL, freshly distilled from P<sub>4</sub>O<sub>10</sub>) was added to Al[N(C<sub>6</sub>F<sub>5</sub>)<sub>2</sub>]<sub>3</sub> (100 mg, 0.1 mmol). The reaction mixture was stirred for 5 min at 50 °C. The solution turned dark and a black solid precipitated indicating decomposition of the reactant.

**Reaction of Al[N(C<sub>6</sub>F<sub>5</sub>)<sub>2</sub>]<sub>3</sub> with C<sub>6</sub>F<sub>6</sub>:** C<sub>6</sub>F<sub>6</sub> (2 mL, freshly distilled from P<sub>4</sub>O<sub>10</sub>) was added to Al[N(C<sub>6</sub>F<sub>5</sub>)<sub>2</sub>]<sub>3</sub> (100 mg, 0.1 mmol). The reaction mixture was stirred for 5 min at 60 °C. The <sup>19</sup>F NMR spectrum of the solution did not show any reaction. A black precipitate formed after stirring the reaction mixture for 2 h at 65 °C indicating decomposition of the reactant.

**Preparation of [CPh<sub>3</sub>]<sup>+</sup>[(C<sub>6</sub>F<sub>5</sub>)<sub>2</sub>N]<sub>3</sub>AlF-Li-FAl(N(C<sub>6</sub>F<sub>5</sub>)<sub>2</sub>)<sub>3</sub>]<sup>-</sup>:** A solution of *n*-butyllithium in hexane (0.200 mmol, 2.0 eq.) was added dropwise to a solution of *in situ* generated [CPh<sub>3</sub>]<sup>+</sup>[FAl(N(C<sub>6</sub>F<sub>5</sub>)<sub>2</sub>)<sub>3</sub>]<sup>-</sup> (533.5 mg, 0.400 mmol, 1.0 eq.) in toluene (10 mL) at -80 °C. The red solution changed color to orange and the reaction mixture was allowed to slowly reach room temperature. Cooling the solution again led to the precipitation of orange crystals that were collected and dried *in vacuo*. [CPh<sub>3</sub>]<sup>+</sup>[(C<sub>6</sub>F<sub>5</sub>)<sub>2</sub>N]<sub>3</sub>AlF-Li-FAl(N(C<sub>6</sub>F<sub>5</sub>)<sub>2</sub>)<sub>3</sub>]<sup>-</sup> (287 mg, 0.118 mmol, 59%) was obtained as an orange crystalline solid. M. p. 195.7 °C; <sup>1</sup>H NMR (200 MHz, [D<sub>6</sub>]benzene, 25 °C, TMS): δ=7.14 (t, <sup>3</sup>J(H,H) = 7.5 Hz, 1H, C<sub>6</sub>H<sub>5</sub>), 7.04 (t, <sup>3</sup>J(H,H) = 7.8 Hz, 2H, C<sub>6</sub>H<sub>5</sub>), 6.94 ppm (d, <sup>3</sup>J(H,H) = 7.5 Hz, 2H, C<sub>6</sub>H<sub>5</sub>); <sup>19</sup>F-NMR (188 MHz, [D<sub>6</sub>]benzene, 25 °C, CFCl<sub>3</sub>): δ=-149.6 (br s, 24F, *o*-F), -162.3 (t, <sup>3</sup>J(F,F) = 22 Hz, 12F, *p*-F), -164.2 (t, 24F, <sup>3</sup>J(F,F) = 21 Hz, *m*-F), -179.3 ppm (q, <sup>1</sup>J(F,Li) = 94 Hz, 2F, Al-F); elemental analysis calcd (%) for C<sub>91</sub>H<sub>15</sub>Al<sub>2</sub>F<sub>62</sub>LiN<sub>6</sub>: C 44.96, H 0.62, N 3.46; found: C 44.53, H 0.65, N 3.34.

**Preparation of [Cp<sub>2</sub>ZrMe]<sup>+</sup>[FAl(N(C<sub>6</sub>F<sub>5</sub>)<sub>2</sub>)<sub>3</sub>]<sup>-</sup>:** A solution of Cp<sub>2</sub>ZrMe<sub>2</sub> (39 mg, 0.16 mmol, 1.0 eq.) in toluene (3 mL) was added dropwise to a *in situ* generated solution of [CPh<sub>3</sub>]<sup>+</sup>[FAl(N(C<sub>6</sub>F<sub>5</sub>)<sub>2</sub>)<sub>3</sub>]<sup>-</sup> (210 mg, 0.16 mmol, 1.0 eq.) in toluene (7 mL) at -50 °C. The reaction mixture decolorized, was warmed to room temperature and stirred at that temperature for 1 h. All volatiles were removed *in vacuo* and the residue was washed with pentane and recrystallized from hot benzene. After drying *in vacuo*, [Cp<sub>2</sub>ZrMe]<sup>+</sup>[FAl(N(C<sub>6</sub>F<sub>5</sub>)<sub>2</sub>)<sub>3</sub>]<sup>-</sup> (153 mg, 0.12 mmol, 73%) was obtained as a white crystalline solid. M. p. 107.5 °C (decomp.); <sup>1</sup>H NMR (200 MHz, [D<sub>6</sub>]benzene, 25 °C, TMS): δ=5.81 (s, 10H, C<sub>5</sub>H<sub>5</sub>), 0.12 ppm (br s, 3H, Zr-Me); <sup>19</sup>F-NMR (188 MHz, [D<sub>6</sub>]benzene, 25 °C, CFCl<sub>3</sub>): δ=-148.1 (br s, 1F, AlF), -149.4 (br s, 12F, *o*-F), -160.6 (t, <sup>3</sup>J(F,F) = 22 Hz, 6F, *p*-CF), -163.5 ppm (t, <sup>3</sup>J(F,F) = 20 Hz, 12F, *m*-F); elemental analysis calcd (%) for C<sub>47</sub>H<sub>13</sub>AlF<sub>31</sub>N<sub>3</sub>Zr: C 42.55, H 0.99, N 3.17; found: C 41.76, H 1.08, N 3.31.

**Preparation of Ga[N(C<sub>6</sub>F<sub>5</sub>)<sub>2</sub>]<sub>3</sub>:** A solution of gallium trichloride (0.330 g, 1.878 mmol, 1.0 eq.) in toluene (10 mL) was added to a suspension of LiN(C<sub>6</sub>F<sub>5</sub>)<sub>2</sub> (2.000 g, 5.633 mmol, 3.0 eq.) in toluene (40 mL). The reaction mixture was stirred for 16 h at 90 °C and the hot suspension was filtered over Celite®. The filter cake was extracted twice with toluene (20 mL) and the filtrate was evaporated to dryness *in vacuo*. The white residue was washed twice with hexane (40 mL). After drying *in vacuo* Ga[N(C<sub>6</sub>F<sub>5</sub>)<sub>2</sub>]<sub>3</sub> (1.120 g, 1.005 mmol, 54%) was obtained as a white solid. Single crystals suitable for structure determination were obtained by cooling a saturated solution in toluene from 90 °C to -30 °C.

<sup>13</sup>C NMR (126 MHz, [D<sub>6</sub>]benzene, 25 °C, TMS): δ=142.8 (dd, <sup>1</sup>J(C,F) = 246.5 Hz, <sup>2</sup>J(C,F) = 11.5 Hz, *o*-C<sub>Ar</sub>), 138.9 (dt, <sup>1</sup>J(C,F) = 256.3 Hz, <sup>2</sup>J(C,F) = 13.5 Hz, *p*-C<sub>Ar</sub>), 137.9 (dt, <sup>1</sup>J(C,F) = 256.3 Hz, <sup>2</sup>J(C,F) = 12.9 Hz, *m*-C<sub>Ar</sub>), 120.8 ppm (t, <sup>2</sup>J(C,F) = 9.3 Hz, *ipso*-C<sub>Ar</sub>); <sup>19</sup>F NMR (376 MHz, [D<sub>6</sub>]benzene, 25 °C, CFCl<sub>3</sub>): δ=-151.8 (d, <sup>3</sup>J(F,F) = 20.6 Hz, 12F, *o*-F), -158.1 (dt, <sup>3</sup>J(F,F) = 21.7 Hz, <sup>4</sup>J(F,F) = 4.8 Hz, 6F, *p*-F), -161.4 ppm (t, <sup>3</sup>J(F,F) = 21.1 Hz, 12F, *m*-F); IR:  $\tilde{\nu}$ =410 (w), 498 (w), 573 (w), 639 (m), 669 (w), 712 (w), 725 (w), 806 (w), 837 (m), 987 (s), 1026 (s), 1140 (w), 1191 (w), 1264 (w), 1322 (w), 1369 (w), 1501 (s), 1632 (w) cm<sup>-1</sup>; elemental analysis calcd (%) for C<sub>36</sub>F<sub>30</sub>GaN<sub>3</sub>: C 38.81, N 3.77; found: C 38.21, N 3.67.

**Preparation of [AsPh<sub>4</sub>]<sup>+</sup>[ClGa(N(C<sub>6</sub>F<sub>5</sub>)<sub>2</sub>)<sub>3</sub>]<sup>-</sup>:** A solution of Ga[N(C<sub>6</sub>F<sub>5</sub>)<sub>2</sub>]<sub>3</sub> (200 mg, 0.180 mmol, 1.0 eq.) in dichloromethane (7.5 mL) was added to a solution of tetraphenylarsonium chloride (75 mg, 0.180 mmol, 1.0 eq.) in dichloromethane (7.5 mL). The reaction mixture was stirred for 1 h at room temperature and evaporated to dryness *in vacuo*. The remaining solid was washed with pentane (15 mL) and dried *in vacuo*. [AsPh<sub>4</sub>]<sup>+</sup>[ClGa(N(C<sub>6</sub>F<sub>5</sub>)<sub>2</sub>)<sub>3</sub>]<sup>-</sup> (242 mg, 0.158 mmol, 88%) was obtained as a white solid. Single crystals suitable for structure determination were obtained by layering a saturated solution in diethylether with pentane at -30 °C. <sup>1</sup>H NMR (400 MHz, CD<sub>2</sub>Cl<sub>2</sub>, 25 °C, TMS): δ=7.87 (t, <sup>3</sup>J(H,H) = 7.5 Hz, 4H, *p*-H), 7.75 (t, <sup>3</sup>J(H,H) = 7.8 Hz, 8H, *m*-H), 7.61 ppm (d, <sup>3</sup>J(H,H) = 7.5 Hz, 8H, *o*-H); <sup>13</sup>C NMR (101 MHz, CD<sub>2</sub>Cl<sub>2</sub>, 25 °C, TMS): δ=145.6 (dm, <sup>1</sup>J(C,F) = 245.2 Hz, *p*-C), 139.1 (dm, <sup>1</sup>J(C,F) = 247.2 Hz, C<sub>F<sub>Ar</sub></sub>), 135.4 (*p*-C<sub>Ph</sub>), 133.3 (C<sub>Ph</sub>), 131.7 (C<sub>Ph</sub>), 126.6 (*ipso*-C), 120.8 ppm (*ipso*-C<sub>Ph</sub>) (the remaining carbon atoms belonging to the C<sub>6</sub>F<sub>5</sub> groups were not detected due to signal overlay); <sup>19</sup>F NMR (282 MHz, CD<sub>2</sub>Cl<sub>2</sub>, 25 °C, CFCl<sub>3</sub>): δ=-147.7 (d, <sup>3</sup>J(F,F) = 18.1 Hz, 6F, F<sub>Ar</sub>), -165.4 (t, <sup>3</sup>J(F,F) = 21.7 Hz, 3F, *p*-F), -167.0 ppm (t, <sup>3</sup>J(F,F) = 19.9 Hz, 6F, F<sub>Ar</sub>); ESI-MS (CH<sub>2</sub>Cl<sub>2</sub>): *m/z* (%): 383 (100) [M]<sup>+</sup>, HRMS (ESI): *m/z* calcd for C<sub>24</sub>H<sub>20</sub>As<sup>+</sup>: 383.0775 [M]<sup>+</sup>; found: 383.0774, (-)-ESI-MS (CH<sub>2</sub>Cl<sub>2</sub>): *m/z* (%): 348 (100) [N(C<sub>6</sub>F<sub>5</sub>)<sub>2</sub>]<sup>-</sup>, (-)-HRMS (ESI): *m/z* calcd for C<sub>36</sub>ClF<sub>30</sub>GaN<sub>3</sub><sup>-</sup>: 1147.8563 [M]<sup>-</sup>; found: 1147.8576; elemental analysis calcd (%) for C<sub>60</sub>H<sub>20</sub>AsClF<sub>30</sub>GaN<sub>3</sub>: C 47.01, H 1.32, N 2.74; found: C 47.17, H 1.79, N 2.83.

## Crystallographic Information

IPDS I, IPDS II (Stoe) and D8 QUEST (Bruker) diffractometers were used for data collection by the x-ray department at the Philipps-Universität Marburg (*Dr. K. Harms, G. Geiseler, M. Marsch, and R. Riedel*). Data collection, reduction and cell refinement was performed with Stoe IPDS Software or Apex2 (Bruker). Structures were solved with SIR92,<sup>3</sup> SIR97,<sup>4</sup> SIR2004<sup>5</sup> or SHELXS-97<sup>6</sup> and refined with SHELXL-97.<sup>7</sup> Absorption correction was performed with semi-empirical methods within WinGX (Multi-scan<sup>8</sup> or Gaussian<sup>9</sup>) or Apex2 (Multi-scan<sup>10</sup>).

Hydrogen atoms were calculated in their idealized positions and refined with fixed isotropic thermal parameters. All molecular structures were illustrated with Diamond 3<sup>11</sup> using thermal ellipsoids at the 30% probability level for all non-hydrogen atoms.

Crystal data and experimental conditions are listed in S-Table S1-S3. The corresponding CIF files providing full information concerning the molecular structures and experimental conditions are deposited at the Cambridge Crystallographic Data Center.

**Table S1.** Crystal data and experimental conditions.

|                                               | <b>Al[N(C<sub>6</sub>F<sub>5</sub>)<sub>2</sub>]<sub>3</sub></b> | <b>[Cs(PhMe)<sub>3</sub>]<sup>+</sup><br/>[FAI(N(C<sub>6</sub>F<sub>5</sub>)<sub>2</sub>)<sub>3</sub>]<sup>-</sup></b> | <b>[CPh<sub>3</sub>]<sup>+</sup><br/>[Li(FAI(N(C<sub>6</sub>F<sub>5</sub>)<sub>2</sub>)<sub>3</sub>)<sub>2</sub>]<sup>-</sup></b> |
|-----------------------------------------------|------------------------------------------------------------------|------------------------------------------------------------------------------------------------------------------------|-----------------------------------------------------------------------------------------------------------------------------------|
| empirical formula                             | C <sub>36</sub> AlF <sub>30</sub> N <sub>3</sub>                 | C <sub>57</sub> H <sub>24</sub> AlCsF <sub>31</sub> N <sub>3</sub>                                                     | C <sub>91</sub> H <sub>15</sub> Al <sub>2</sub> F <sub>62</sub> LiN <sub>6</sub> ,<br>2(C <sub>7</sub> H <sub>8</sub> )           |
| mol. weight [g mol <sup>-1</sup> ]            | 1071.37                                                          | 1499.68                                                                                                                | 2615.26                                                                                                                           |
| crystal habit                                 | colorless prism                                                  | colorless, irregular                                                                                                   | colorless prism                                                                                                                   |
| crystal size [mm <sup>3</sup> ]               | 0.66 · 0.24 · 0.12                                               | 0.54 · 0.39 · 0.11                                                                                                     | 0.41 · 0.34 · 0.28                                                                                                                |
| crystal system                                | triclinic                                                        | monoclinic                                                                                                             | triclinic                                                                                                                         |
| space group                                   | <i>P</i> -1                                                      | <i>P</i> 121/ <i>c</i> 1                                                                                               | <i>P</i> -1                                                                                                                       |
| a [Å]                                         | 10.8600(10)                                                      | 13.0294(5)                                                                                                             | 14.4989(14)                                                                                                                       |
| b [Å]                                         | 12.7006(11)                                                      | 26.0373(7)                                                                                                             | 18.051(2)                                                                                                                         |
| c [Å]                                         | 14.3671(13)                                                      | 16.8481(6)                                                                                                             | 21.909(2)                                                                                                                         |
| α [°]                                         | 73.501(10)                                                       | 90                                                                                                                     | 84.427(13)                                                                                                                        |
| β [°]                                         | 72.779(11)                                                       | 92.421(3)                                                                                                              | 73.249(12)                                                                                                                        |
| γ [°]                                         | 89.315(11)                                                       | 90                                                                                                                     | 67.033(12)                                                                                                                        |
| volume [Å <sup>3</sup> ]                      | 1809.2(3)                                                        | 5710.6(3)                                                                                                              | 5054.8(9)                                                                                                                         |
| Z                                             | 2                                                                | 4                                                                                                                      | 2                                                                                                                                 |
| density [g cm <sup>-3</sup> ]                 | 1.967                                                            | 1.744                                                                                                                  | 1.718                                                                                                                             |
| T [K]                                         | 193(2)                                                           | 193(2)                                                                                                                 | 193(2)                                                                                                                            |
| absorption coeff. [mm <sup>-1</sup> ]         | 0.248                                                            | 0.808                                                                                                                  | 0.198                                                                                                                             |
| Θ range [°]                                   | 2.0 to 25.9                                                      | 1.4 to 26.0                                                                                                            | 1.9 to 25.0                                                                                                                       |
| index ranges                                  | -13 ≤ h ≤ 13,<br>-15 ≤ k ≤ 15,<br>-17 ≤ l ≤ 17                   | -15 ≤ h ≤ 14,<br>-31 ≤ k ≤ 31,<br>-20 ≤ l ≤ 20                                                                         | -17 ≤ h ≤ 17,<br>-21 ≤ k ≤ 21,<br>-26 ≤ l ≤ 26                                                                                    |
| reflns collected                              | 17179                                                            | 44417                                                                                                                  | 45908                                                                                                                             |
| independent reflns                            | 6574 [R(int) = 0.0444]                                           | 11041<br>[R(int) = 0.0308]                                                                                             | 16752<br>[R(int) = 0.0581]                                                                                                        |
| absorption correction                         | empirical                                                        | multi-scan                                                                                                             | gaussian                                                                                                                          |
| max. and min. transmission                    | 0.931 and 0.971                                                  | 0.8482 and 0.6968                                                                                                      | 0.9551 and 0.932                                                                                                                  |
| transmissiondata/restraints<br>/parameters    | 6574 / 1 / 631                                                   | 11041 / 0 / 802                                                                                                        | 16752 / 11 / 1458                                                                                                                 |
| goodness-of-fit on F <sup>2</sup>             | 0.853                                                            | 1.097                                                                                                                  | 0.793                                                                                                                             |
| final R indices [I>2s(I)]                     | R1 = 0.0375                                                      | R1 = 0.0601                                                                                                            | R1 = 0.0538                                                                                                                       |
| R indices (all data)                          | wR2 = 0.0914                                                     | wR2 = 0.1779                                                                                                           | wR2 = 0.1483                                                                                                                      |
| larg. diff. peak/hole<br>[e Å <sup>-3</sup> ] | 0.274 / -0.308                                                   | 1.245 / -2.580                                                                                                         | 0.764 / -0.701                                                                                                                    |
| treatment of H atoms                          | -                                                                | constr.                                                                                                                | constr.                                                                                                                           |

**Table S2.** Crystal data and experimental conditions.

|                                               | <b>Ga[N(C<sub>6</sub>F<sub>5</sub>)<sub>2</sub>]<sub>3</sub></b> | <b>[AsPh<sub>4</sub>]<sup>+</sup><br/>[ClGa(N(C<sub>6</sub>F<sub>5</sub>)<sub>2</sub>)<sub>3</sub>]<sup>-</sup></b>                                 |
|-----------------------------------------------|------------------------------------------------------------------|-----------------------------------------------------------------------------------------------------------------------------------------------------|
| empirical formula                             | C <sub>36</sub> F <sub>30</sub> GaN <sub>3</sub>                 | C <sub>120</sub> H <sub>40</sub> As <sub>2</sub> Cl <sub>2</sub> F <sub>60</sub> Ga <sub>2</sub> N <sub>6</sub> ,<br>C <sub>3</sub> H <sub>12</sub> |
| mol. weight [g mol <sup>-1</sup> ]            | 1114.11                                                          | 3137.91                                                                                                                                             |
| crystal habit                                 | colorless prism                                                  | colorless plate                                                                                                                                     |
| crystal size [mm <sup>3</sup> ]               | 0.30 · 0.05 · 0.04                                               | 0.28 · 0.08 · 0.05                                                                                                                                  |
| crystal system                                | monoclinic                                                       | triclinic                                                                                                                                           |
| space group                                   | <i>P</i> 21/ <i>c</i>                                            | <i>P</i> -1                                                                                                                                         |
| a [Å]                                         | 7.9908(7)                                                        | 11.2887(5)                                                                                                                                          |
| b [Å]                                         | 20.611(3)                                                        | 13.9044(7)                                                                                                                                          |
| c [Å]                                         | 22.8236(19)                                                      | 20.9274(11)                                                                                                                                         |
| α [°]                                         | 90                                                               | 98.126(2)                                                                                                                                           |
| β [°]                                         | 108.292(7)                                                       | 103.279(2)                                                                                                                                          |
| γ [°]                                         | 90                                                               | 111.8210(10)                                                                                                                                        |
| volume [Å <sup>3</sup> ]                      | 3569.1(7)                                                        | 2873.0(2)                                                                                                                                           |
| Z                                             | 4                                                                | 1                                                                                                                                                   |
| density [g cm <sup>-3</sup> ]                 | 2.073                                                            | 1.802                                                                                                                                               |
| T [K]                                         | 100(2)                                                           | 100(2)                                                                                                                                              |
| absorption coeff. [mm <sup>-1</sup> ]         | 0.966                                                            | 1.241                                                                                                                                               |
| Θ range [°]                                   | 1.4 to 26.9                                                      | 2.0 to 27.0                                                                                                                                         |
| index ranges                                  | -10 ≤ h ≤ 9,<br>-24 ≤ k ≤ 26,<br>-28 ≤ l ≤ 28                    | -14 ≤ h ≤ 14,<br>-17 ≤ k ≤ 17,<br>-26 ≤ l ≤ 26                                                                                                      |
| reflns collected                              | 19281                                                            | 55879                                                                                                                                               |
| independent reflns                            | 7542 [R(int) = 0.1328]                                           | 12537<br>[R(int) = 0.0897]                                                                                                                          |
| absorption correction                         | multi-scan                                                       | multi-scan                                                                                                                                          |
| max. and min. transmission                    | 0.9624 and 0.7604                                                | 1.0000 and 0.8474                                                                                                                                   |
| transmissiondata/restraints<br>/parameters    | 7542 / 0 / 625                                                   | 12537 / 30 / 913                                                                                                                                    |
| goodness-of-fit on F <sup>2</sup>             | 0.712                                                            | 1.074                                                                                                                                               |
| final R indices [I>2s(I)]                     | R1 = 0.0509                                                      | R1 = 0.0375                                                                                                                                         |
| R indices (all data)                          | wR2 = 0.1359                                                     | wR2 = 0.1042                                                                                                                                        |
| larg. diff. peak/hole<br>[e Å <sup>-3</sup> ] | 0.991 / -1.138                                                   | 0.662 / -0.649                                                                                                                                      |
| treatment of H atoms                          | -                                                                | constr.                                                                                                                                             |



## Quantumchemical Calculations

DFT optimizations were carried out with TURBOMOLE<sup>12,13</sup> at the (RI-)BP86<sup>14,15,16</sup>/def-TZVP<sup>17</sup>, with RI-J auxiliary bases<sup>18,19,20</sup> and D3<sup>21</sup> dispersion correction. Vibrational frequencies were calculated analytically with the AOFORCE<sup>22,23</sup> module and all structures represented true minima without imaginary frequencies on the respective hypersurface. Thermal contributions to *ab initio* reaction energies (see below) were calculated with inclusion of zero point energy, thermal contributions to the enthalpy/entropy (FREEH tool; unscaled<sup>24</sup> BP86/def-TZVP/D3 vibrational frequencies).

RI-MP2 structure optimisations were carried out with TURBOMOLE<sup>12</sup> and def2-QZVPP<sup>17</sup> basis sets and corresponding RI-C auxiliary bases<sup>14</sup> for all atoms. Frozen core: 1s for 2<sup>nd</sup> row elements, 1s2s2p for Al, none for H, 1s2s2p3s3p for Ga.

MP2 and CCSD(T) single point calculations with correlation-consistent basis sets were done with Gaussian 03.<sup>[13]</sup> Basis set extrapolation was done with the following formula:

$$\Delta E_{\text{CCSD(T)/A'VQZ}} \approx \Delta E_{\text{compound}} = \Delta E_{\text{CCSD(T)/A'VDZ}} + \Delta E_{\text{MP2/A'VQZ}} - \Delta E_{\text{MP2/A'VDZ}}$$

with A'VXZ = cc-pVXZ for H<sup>25</sup>, aug-cc-pV(X+d)Z for Al<sup>26</sup>, aug-cc-pwCVXZ-PP for Ga<sup>27</sup>, aug-cc-pVXZ for 2<sup>nd</sup> row elements<sup>28</sup> (X = D, Q).

Frozen core: 1s for 2<sup>nd</sup> row elements, 1s2s2p for Al, none for H and Ga.

Thermal contributions to reaction energies were calculated with BP86-D3/def-TZVP at 1 bar, 298.15 K:

$$\Delta U^\circ = \Delta E_{\text{QM}} + \Delta E_{\text{vrt}}$$

( $\Delta E_{\text{QM}} = \Delta E_{\text{SCF}}$  for DFT,  $\Delta E_{\text{compound}}$  for ab-initio calculations;  $\Delta E_{\text{vrt}}$  = sum of translational, rotational, and vibrational energy incl. zero point vibrational energy)

$$\Delta H^\circ = \Delta U^\circ + \Delta n RT \quad (\Delta n = \text{particle number change in reaction equation})$$

$$\Delta G^\circ = \Delta H^\circ - 298.15 \text{ K} \cdot \Delta S^\circ$$

**Table S3.** Details on ab initio calculations (with thermal corrections at BP86-D3/def-TZVP level).

|                               | CCSD(T)/A'VDZ<br>[H] | MP2/A'VDZ<br>[H] | MP2/A'VQZ<br>[H] | $E_{\text{comp}}$<br>[kJ mol <sup>-1</sup> ] | $H^\circ$<br>[kJ mol <sup>-1</sup> ] | $G^\circ$<br>[kJ mol <sup>-1</sup> ] |
|-------------------------------|----------------------|------------------|------------------|----------------------------------------------|--------------------------------------|--------------------------------------|
| F <sup>-</sup>                | -99.668634           | -99.665948       | -99.774407       | -348070.66                                   | -347943.15                           | -348015.74                           |
| AlF <sub>3</sub>              | -541.216273          | -541.198926      | -541.556053      | -1421900.96                                  | -1421867.26                          | -1421950.52                          |
| AlF <sub>4</sub> <sup>-</sup> | -641.066362          | -641.043002      | -641.511473      | -1684349.70                                  | -1684307.74                          | -1684396.96                          |
| GaF <sub>3</sub>              | -557.728995          | -557.717825      | -558.354450      | -1465988.94                                  | -1465957.94                          | -1466045.63                          |
| GaF <sub>4</sub> <sup>-</sup> | -657.566082          | -657.549237      | -658.296248      | -1728401.03                                  | -1728362.13                          | -1728456.65                          |

**Table S4.** Details on BP86-D3/def-TZVP calculations.

|                                                                                    | SCF<br>[H]   | E <sub>vrt</sub><br>[kJ mol <sup>-1</sup> ] | S°<br>[kJ mol <sup>-1</sup> K <sup>-1</sup> ] | H°<br>[kJ mol <sup>-1</sup> ] | G°<br>[kJ mol <sup>-1</sup> ] |
|------------------------------------------------------------------------------------|--------------|---------------------------------------------|-----------------------------------------------|-------------------------------|-------------------------------|
| F <sup>-</sup>                                                                     | -99.879116   | 3.72                                        | 0.14547                                       | -262226.42                    | -262269.79                    |
| AlF <sub>3</sub>                                                                   | -542.338235  | 31.22                                       | 0.27925                                       | -1423875.34                   | -1423958.59                   |
| AlF <sub>4</sub> <sup>-</sup>                                                      | -642.410764  | 39.48                                       | 0.29923                                       | -1686607.50                   | -1686696.72                   |
| GaF <sub>3</sub>                                                                   | -2224.913325 | 28.52                                       | 0.29413                                       | -5841478.94                   | -5841566.63                   |
| GaF <sub>4</sub> <sup>-</sup>                                                      | -2324.972266 | 36.42                                       | 0.31705                                       | -6104175.78                   | -6104270.31                   |
| Al(N(C <sub>6</sub> F <sub>5</sub> ) <sub>2</sub> ) <sub>3</sub>                   | -4775.691260 | 965.88                                      | 1.49104                                       | -12537609.04                  | -12538053.60                  |
| FAI(N(C <sub>6</sub> F <sub>5</sub> ) <sub>2</sub> ) <sub>3</sub> <sup>-</sup>     | -4875.791366 | 973.64                                      | 1.49255                                       | -12800414.11                  | -12800859.12                  |
| Ga(N(C <sub>6</sub> F <sub>5</sub> ) <sub>2</sub> ) <sub>3</sub>                   | -6458.327682 | 966.81                                      | 1.48051                                       | -16955370.04                  | -16955811.45                  |
| FGa(N(C <sub>6</sub> F <sub>5</sub> ) <sub>2</sub> ) <sub>3</sub> <sup>-</sup>     | -6558.396066 | 972.77                                      | 1.47152                                       | -17218093.62                  | -17218532.35                  |
| Al(N(C <sub>6</sub> F <sub>5</sub> ) <sub>2</sub> ) <sub>3</sub>                   | -3584.411955 | 1185.68                                     | 1.26100                                       | -9409685.43                   | -9410061.39                   |
| FAI(N(N(C <sub>6</sub> F <sub>5</sub> ) <sub>2</sub> ) <sub>3</sub> ) <sup>-</sup> | -3684.528095 | 1192.54                                     | 1.29373                                       | -9672533.49                   | -9672919.22                   |

MP2/def2-QZVPP coordinates (atomic units, Turbomole format)

AlF<sub>3</sub>, D<sub>3h</sub>

```

0.0000000000000000  0.0000000000000000  0.0000000000000000  al
1.54642228740784   -2.67848197174726  0.0000000000000000  f
1.54642228740784    2.67848197174726  0.0000000000000000  f
-3.09284457481566  0.0000000000000000  0.0000000000000000  f

```

AlF<sub>4</sub><sup>-</sup>, T<sub>d</sub>

```

0.0000000000000000  0.0000000000000000  0.0000000000000000  al
1.84949633922621   -1.84949633922621  1.84949633922621  f
-1.84949633922621  1.84949633922621  1.84949633922621  f
-1.84949633922621  -1.84949633922621  -1.84949633922621  f
1.84949633922621  1.84949633922621  -1.84949633922621  f

```

GaF<sub>3</sub>, D<sub>3h</sub>

```

0.0000000000000000  0.0000000000000000  0.0000000000000000  ga
1.61953241012213   -2.80511241883599  0.0000000000000000  f
1.61953241012213    2.80511241883599  0.0000000000000000  f
-3.23906482024423  0.0000000000000000  0.0000000000000000  f

```

GaF<sub>4</sub><sup>-</sup>, T<sub>d</sub>

```

0.0000000000000000  0.0000000000000000  0.0000000000000000  ga
1.93854254827746   -1.93854254827746  1.93854254827746  f
-1.93854254827746  1.93854254827746  1.93854254827746  f
-1.93854254827746  -1.93854254827746  -1.93854254827746  f
1.93854254827746  1.93854254827746  -1.93854254827746  f

```

BP86-D3/def-TZVP coordinates (atomic units, Turbomole format)

AlF<sub>3</sub>, D<sub>3h</sub>

|                   |                   |                  |    |
|-------------------|-------------------|------------------|----|
| 0.00000000000000  | 0.00000000000000  | 0.00000000000000 | al |
| 1.56940806082359  | -2.71829449915461 | 0.00000000000000 | f  |
| 1.56940806082359  | 2.71829449915461  | 0.00000000000000 | f  |
| -3.13881612164718 | 0.00000000000000  | 0.00000000000000 | f  |

AlF<sub>4</sub><sup>-</sup>, T<sub>d</sub>

|                   |                   |                   |    |
|-------------------|-------------------|-------------------|----|
| 0.00000000000000  | 0.00000000000000  | 0.00000000000000  | al |
| 1.87974602471639  | -1.87974602471639 | 1.87974602471639  | f  |
| -1.87974602471639 | 1.87974602471639  | 1.87974602471639  | f  |
| -1.87974602471639 | -1.87974602471639 | -1.87974602471639 | f  |
| 1.87974602471639  | 1.87974602471639  | -1.87974602471639 | f  |

GaF<sub>3</sub>, D<sub>3h</sub>

|                   |                   |                  |    |
|-------------------|-------------------|------------------|----|
| 0.00000000000000  | 0.00000000000000  | 0.00000000000000 | ga |
| 1.65443129382760  | -2.86555905854132 | 0.00000000000000 | f  |
| 1.65443129382760  | 2.86555905854132  | 0.00000000000000 | f  |
| -3.30886258765519 | 0.00000000000000  | 0.00000000000000 | f  |

GaF<sub>4</sub><sup>-</sup>, T<sub>d</sub>

|                   |                   |                   |    |
|-------------------|-------------------|-------------------|----|
| 0.00000000000000  | 0.00000000000000  | 0.00000000000000  | ga |
| 1.98100527642910  | -1.98100527642910 | 1.98100527642910  | f  |
| -1.98100527642910 | 1.98100527642910  | 1.98100527642910  | f  |
| -1.98100527642910 | -1.98100527642910 | -1.98100527642910 | f  |
| 1.98100527642910  | 1.98100527642910  | -1.98100527642910 | f  |

Al(N(C<sub>6</sub>F<sub>5</sub>)<sub>2</sub>)<sub>3</sub>, C<sub>1</sub>

|                   |                   |                   |    |
|-------------------|-------------------|-------------------|----|
| 0.06751439987584  | 0.12896607972366  | 0.06448722572172  | al |
| 1.26114557924050  | -0.67476825710019 | 3.28832927470843  | n  |
| -0.18719906172103 | -2.34673919239267 | -2.44511856762995 | n  |
| -0.90671112891604 | 3.37550087863069  | -0.60708293849819 | n  |
| -0.25452995655689 | -2.02369513823070 | 5.03933421607934  | c  |
| -2.21552205736257 | -0.81369644318966 | 6.34709602401144  | c  |
| -3.83452573397034 | -2.13511316524962 | 7.95645684828362  | c  |
| -3.49211631692481 | -4.73194898882164 | 8.30664039792928  | c  |
| -1.54445545768759 | -5.98781477149522 | 7.03328008094384  | c  |

|                   |                   |                   |   |
|-------------------|-------------------|-------------------|---|
| 0.02910747613855  | -4.63658673421821 | 5.40585817181277  | c |
| 3.86943709565593  | -0.55193076192771 | 3.65088265034202  | c |
| 5.23315871063070  | -0.97486552590248 | 5.89574664814126  | c |
| 7.86819431926871  | -0.75964348226433 | 5.96691643834010  | c |
| 9.24289142325106  | -0.04244178182685 | 3.82626184971696  | c |
| 7.94656710166230  | 0.44304477266218  | 1.57235692964254  | c |
| 5.34533199431155  | 0.18506706561897  | 1.58308862487729  | c |
| 1.66564379163984  | -2.68924847388435 | -4.35403523021411 | c |
| 4.01960545249688  | -3.76872630429153 | -3.78865406151341 | c |
| 5.90946251620673  | -4.01574935379875 | -5.61134242616736 | c |
| 5.43955652319794  | -3.22244849273128 | -8.08845461631019 | c |
| 3.09246106410377  | -2.18061858118089 | -8.71805118048475 | c |
| 1.24205981468959  | -1.92488753693519 | -6.85700710789153 | c |
| -2.30353716725376 | -3.91126446701576 | -2.36671955794315 | c |
| -2.84500911207734 | -6.05020076505986 | -3.85871956159386 | c |
| -5.07171200965031 | -7.43872409328608 | -3.52001948649645 | c |
| -6.82619374853387 | -6.79462907911670 | -1.65094748885815 | c |
| -6.34427582366043 | -4.69566249748017 | -0.11591148952313 | c |
| -4.12779466009152 | -3.36741637345627 | -0.52353545019049 | c |
| -1.46666161452717 | 4.24081250497874  | -3.08043587974737 | c |
| -3.41759555874901 | 3.19378009566404  | -4.54204737991560 | c |
| -3.93170295925350 | 4.02759887193449  | -6.99056160829455 | c |
| -2.51878227782077 | 6.00408527604463  | -8.02307305696860 | c |
| -0.58158835102694 | 7.11228955338050  | -6.60501854051113 | c |
| -0.06724256292821 | 6.21894908513685  | -4.17797872800549 | c |
| -1.25443758482355 | 5.15994514027292  | 1.36379156087519  | c |
| -3.65564288425623 | 6.17672646075400  | 1.87797200966661  | c |
| -4.05871002063578 | 7.87551193981028  | 3.85350132082068  | c |
| -2.03963879147727 | 8.57301823467270  | 5.41006276207126  | c |
| 0.36635722719442  | 7.58480536561524  | 4.95514279219533  | c |
| 0.73719427720226  | 5.93112227371461  | 2.93515444796662  | c |
| -2.58674648841316 | 1.68515521792809  | 6.01552551297914  | f |
| -5.70450602990902 | -0.92808694142972 | 9.17107144254650  | f |
| -5.02834187573567 | -6.01729011005490 | 9.85660921247152  | f |
| -1.22165407708294 | -8.48308223223622 | 7.35992859755187  | f |
| 1.87173830242983  | -5.87134528465447 | 4.15787419564950  | f |
| 4.02051406878363  | -1.60496922971211 | 8.05054955048278  | f |
| 9.09319373287745  | -1.21137248587658 | 8.13997671502691  | f |
| 11.76784219016016 | 0.17282876779094  | 3.92545191744064  | f |

|                   |                   |                    |   |
|-------------------|-------------------|--------------------|---|
| 9.18256825053870  | 1.13171028644037  | -0.52888902498683  | f |
| 3.99571438396326  | 0.68251778092117  | -0.63480683612480  | f |
| 4.48859040043811  | -4.57340581377513 | -1.41699968370707  | f |
| 8.15697311685884  | -5.02347352196894 | -5.00678171180755  | f |
| 7.23528920549483  | -3.45987014595555 | -9.85696290112296  | f |
| 2.63411461721482  | -1.43835565444643 | -11.09928805879517 | f |
| -1.02644582880823 | -0.97281606939729 | -7.50256503825337  | f |
| -1.22297654833394 | -6.82824634741861 | -5.66890117688362  | f |
| -5.50942376164947 | -9.45356787190735 | -4.99391213225957  | f |
| -8.93837715122354 | -8.16164048027567 | -1.33394929412549  | f |
| -7.96175154420138 | -4.00537212008128 | 1.70737593757698   | f |
| -3.60434494595913 | -1.25675897984220 | 0.97280727524132   | f |
| -4.84865785957300 | 1.31494005265298  | -3.58303219320586  | f |
| -5.78823622818185 | 2.95265992312230  | -8.34581373593747  | f |
| -3.00318797374704 | 6.82518403330215  | -10.37182234571437 | f |
| 0.79587062047474  | 8.99804400545695  | -7.60231516131639  | f |
| 1.83405625634564  | 7.27958794807529  | -2.85788469202895  | f |
| -5.64224181855026 | 5.45732487666144  | 0.45725117157137   | f |
| -6.38010345735764 | 8.79902209066942  | 4.30404496675461   | f |
| -2.41250709693337 | 10.18114406571959 | 7.33414068419226   | f |
| 2.31774058315321  | 8.26397471029221  | 6.43240404007721   | f |
| 3.09519303006443  | 5.05315619224130  | 2.51126684931763   | f |

FAI(N(C<sub>6</sub>F<sub>5</sub>)<sub>2</sub>)<sub>3</sub><sup>-</sup>, C<sub>1</sub>

|                    |                   |                    |    |
|--------------------|-------------------|--------------------|----|
| -0.49237691634568  | -1.61299410488604 | -0.38483340821645  | al |
| -1.40353721963105  | -4.63197694594500 | -1.02384533574972  | f  |
| 3.68772771267369   | 2.45984847296226  | -6.28421777333642  | f  |
| 4.52567109600297   | 0.73341667995492  | -11.02078557656299 | f  |
| 4.39721772505368   | -4.36210753439389 | -12.01626114992226 | f  |
| 3.54024065951921   | -7.70691199340578 | -8.14816820756238  | f  |
| 2.89473565622627   | -6.02444141070904 | -3.37917756456209  | f  |
| 1.43274807242295   | 4.21262044050629  | -0.67230938676732  | f  |
| 4.97798266363349   | 7.20490746257831  | 1.50081815453078   | f  |
| 9.87494121213658   | 5.54120139589632  | 1.96581694337193   | f  |
| 11.14318606501271  | 0.80139269936533  | 0.27775321643534   | f  |
| 7.57365291908959   | -2.25891100518370 | -1.76809942735766  | f  |
| -6.57277140233547  | -0.16082350577355 | -5.62437969428286  | f  |
| -10.78705204038993 | -3.03519726572130 | -5.98062379962851  | f  |
| -12.25190646765333 | -6.05457529796346 | -2.01544480846462  | f  |

|                    |                   |                   |   |
|--------------------|-------------------|-------------------|---|
| -9.45289354384851  | -6.07146165702872 | 2.35982458280100  | f |
| -5.33383971854177  | -3.07389301156270 | 2.80402602466528  | f |
| -6.92346643360817  | 3.10615016091259  | 1.56643301340800  | f |
| -7.66090414790250  | 8.06591963977478  | 0.40735077295236  | f |
| -5.16825885953081  | 10.19487089183705 | -3.61248451230780 | f |
| -2.00551496930603  | 7.28783351826883  | -6.52005219968372 | f |
| -1.38972249543143  | 2.29908377682567  | -5.44742731762012 | f |
| -1.78810052203839  | 3.84038572943575  | 3.31906965151625  | f |
| -5.24177335688482  | 4.91931915614698  | 6.94593331381027  | f |
| -6.31579490800078  | 1.44332925160036  | 10.64273294654295 | f |
| -3.90939489113737  | -3.15050679911007 | 10.63757423007725 | f |
| -0.55667107039969  | -4.30004117842912 | 6.91017562876077  | f |
| 3.08875116107537   | -5.57451442420498 | 2.03168986886958  | f |
| 7.96856458634911   | -6.34684419832179 | 3.38054571709551  | f |
| 10.56657965448369  | -2.70930874519441 | 6.01317911442880  | f |
| 8.20640230325089   | 1.75081759819668  | 7.23310252068443  | f |
| 3.37201764184320   | 2.60145422208156  | 5.77272781809461  | f |
| 2.49194764066941   | -0.77203964536750 | -2.22864416977198 | n |
| -3.60643338357389  | 0.02637847537439  | -1.17442131329774 | n |
| 0.57839180540803   | -0.94810690607014 | 2.98428414102589  | n |
| 3.01714650614540   | -1.70535765766097 | -4.67126405870812 | c |
| 3.58469165912836   | -0.05623404307196 | -6.69034062591786 | c |
| 4.04668309504482   | -0.92048168996979 | -9.13686471582808 | c |
| 3.98292922468108   | -3.50759707235241 | -9.64832295875935 | c |
| 3.49666434885486   | -5.19862592927950 | -7.68505478651385 | c |
| 3.09943672756372   | -4.31070510172746 | -5.22936582681261 | c |
| 4.35643877723856   | 0.85568637283718  | -1.25411074439886 | c |
| 3.79329636822908   | 3.30398650175105  | -0.39226549767568 | c |
| 5.60651148842888   | 4.86962300954671  | 0.70707880398547  | c |
| 8.10223204170503   | 4.04029924227807  | 0.92015452612340  | c |
| 8.74681071817561   | 1.63903794788708  | 0.03147328058216  | c |
| 6.89761026407720   | 0.08860393230206  | -1.02530112438010 | c |
| -5.79214676514972  | -1.48642604893649 | -1.37937773475050 | c |
| -7.27379745588690  | -1.54342702655865 | -3.59343701944073 | c |
| -9.43713329704239  | -3.03501420198019 | -3.81285792296482 | c |
| -10.17471629742583 | -4.58663651800763 | -1.81200803827033 | c |
| -8.73560178221728  | -4.60669491405605 | 0.39944033652177  | c |
| -6.61534695439655  | -3.05724988451176 | 0.60214267356869  | c |
| -4.01327836461735  | 2.57774218412450  | -1.82149347545029 | c |

|                   |                   |                   |   |
|-------------------|-------------------|-------------------|---|
| -5.68987753076466 | 4.10376694123476  | -0.43282504155683 | c |
| -6.08863961721813 | 6.64304597705069  | -1.01009462117795 | c |
| -4.81447043888930 | 7.73267934500018  | -3.04974746127862 | c |
| -3.17768135318769 | 6.25917371451082  | -4.50317744245129 | c |
| -2.83916947387536 | 3.71222890455267  | -3.91361790512121 | c |
| -1.11723793789296 | -0.29556721386028 | 4.93954190211815  | c |
| -2.34562814435277 | 2.05325201378988  | 5.03744878544421  | c |
| -4.10477716560792 | 2.64028365705481  | 6.91265935380543  | c |
| -4.63061185802347 | 0.88753279681884  | 8.81154586072228  | c |
| -3.38896715200552 | -1.44223566409790 | 8.81466128353930  | c |
| -1.66871754994554 | -2.00744269780797 | 6.90093029085219  | c |
| 3.05199909552865  | -1.45230769888551 | 3.82206820330020  | c |
| 4.31719038928890  | -3.72605318194445 | 3.26017694052668  | c |
| 6.82816513073765  | -4.14405163705753 | 3.95603093600899  | c |
| 8.14786288433488  | -2.30986091306390 | 5.31751376079143  | c |
| 6.93190737084361  | -0.05767737463814 | 5.96299058316631  | c |
| 4.43987682020200  | 0.34842998628265  | 5.21380746642419  | c |

Al(N(C<sub>6</sub>H<sub>2</sub>F<sub>3</sub>)<sub>2</sub>)<sub>3</sub>, C<sub>1</sub>

|                    |                   |                   |    |
|--------------------|-------------------|-------------------|----|
| -5.29206295796552  | -0.65820321914183 | -0.54852678814659 | c  |
| -5.00119249004266  | -2.35933234830767 | -2.55994984949647 | c  |
| -6.81728455022539  | -4.21523586062756 | -2.96584558906338 | c  |
| -9.00423284707490  | -4.35106926539792 | -1.49583225713986 | c  |
| -9.31314973886204  | -2.57329230513172 | 0.44081708625076  | c  |
| -7.49282323996044  | -0.75345070234674 | 0.93930060809088  | c  |
| -3.34567779243723  | -2.31756815801638 | -3.78546694335760 | h  |
| -6.49557231517613  | -5.90991060493557 | -4.84352934667174 | f  |
| -10.76201306385050 | -6.12987031492094 | -1.93114665581889 | f  |
| -11.41533820965835 | -2.69902688392178 | 1.87418189098361  | f  |
| -7.76589001285946  | 0.52998315798733  | 2.52423540403919  | h  |
| 0.00008726750997   | 0.00663523023658  | 0.02422635201711  | al |
| -3.30203598796798  | 1.03639209171901  | 0.08163618106186  | n  |
| 3.17421536774107   | -4.25904098894617 | -0.71046521202625 | c  |
| 2.06776841980208   | 4.89393861160799  | -0.80305273534852 | c  |
| -3.97252470936402  | 3.55413486533665  | 0.74253048466643  | c  |
| 5.07305383098563   | 1.68604724764555  | 0.54900416696433  | c  |
| -1.05358402264320  | -5.19833657497052 | 0.83708603101012  | c  |
| 4.39138697786838   | -3.16455734020724 | -2.79518909920002 | c  |
| 0.39765678445865   | 5.42060213663957  | -2.79275002441256 | c  |

|                   |                    |                   |   |
|-------------------|--------------------|-------------------|---|
| -2.70292124471207 | 4.79609453489731   | 2.71033309204921  | c |
| 5.55512539684293  | 0.05477049598178   | 2.58184559576048  | c |
| -2.64820277897905 | -4.69817875723138  | 2.89469458201820  | c |
| 6.87559645627045  | -3.82427133115755  | -3.34435562974790 | c |
| -0.29655919236563 | 7.90777618383136   | -3.28303435391634 | c |
| -3.14973257261477 | 7.35087660753499   | 3.13627384439146  | c |
| 7.99576724494194  | -0.83376613005180  | 2.98465585138176  | c |
| -4.61288610206465 | -6.35388455617677  | 3.44966112878452  | c |
| 8.15771395173104  | -5.65915382731411  | -1.94700044919952 | c |
| 0.73252638213196  | 9.92224854153926   | -1.92412433605125 | c |
| -4.93605947749968 | 8.69359577310279   | 1.73258219333278  | c |
| 10.01961199503747 | -0.03723156102554  | 1.49047453503960  | c |
| -4.96563226878850 | -8.58530505820845  | 2.08568869913939  | c |
| 6.87826707073192  | -6.80790290049670  | 0.06552288385783  | c |
| 2.47569488231359  | 9.36916050333699   | -0.01060996185494 | c |
| -6.26080494180346 | 7.39801815171243   | -0.15728603369524 | c |
| 9.52141750067441  | 1.67419824689403   | -0.46609268040889 | c |
| -3.29422477605100 | -9.10476423800038  | 0.10007508289532  | c |
| 4.42969779802891  | -6.12460053327725  | 0.70731330087163  | c |
| 3.13823052120160  | 6.90046230857277   | 0.57334398243194  | c |
| -5.79350188592240 | 4.87109294797750   | -0.67735190996624 | c |
| 7.09191870065867  | 2.52561121667753   | -0.96271458558556 | c |
| -1.36967447289172 | -7.44595239199935  | -0.54692435708202 | c |
| 3.46709416972661  | -1.74693643273998  | -3.97023542107532 | h |
| -0.43735949367962 | 3.92242548872452   | -3.93391749500874 | h |
| -1.31125687122321 | 3.83108492981715   | 3.88342489534746  | h |
| 4.05041475500957  | -0.60254849181502  | 3.82602758159360  | h |
| -2.43860436479260 | -3.00004854130381  | 4.04244095799497  | h |
| 8.07982958591225  | -2.70470778953079  | -5.29293144813237 | f |
| -1.97432347886076 | 8.41083714980842   | -5.13581887237387 | f |
| -1.86433409012268 | 8.57139403005229   | 4.96889328150032  | f |
| 8.44633928362801  | -2.47680210789376  | 4.88174156129669  | f |
| -6.20440504346922 | -5.82850264919935  | 5.37124161516360  | f |
| 10.54404124628380 | -6.30741779517782  | -2.52052246115555 | f |
| 0.07479407616374  | 12.31874778127825  | -2.44165177394391 | f |
| -5.37576364192402 | 11.15197122607406  | 2.18756160271893  | f |
| 12.37425443403706 | -0.88244934048983  | 1.92100308994976  | f |
| -6.84699147170399 | -10.18803886484405 | 2.66539489809307  | f |
| 8.10602987922766  | -8.57605698456248  | 1.42763603361832  | f |



|                   |                    |                   |   |
|-------------------|--------------------|-------------------|---|
| 3.47141920187090  | 11.30298379816784  | 1.31548928991814  | f |
| -7.98484357163795 | 8.68208732467447   | -1.52413804037682 | f |
| 11.46425787218063 | 2.44759808061190   | -1.92089237433735 | f |
| -3.62693399559438 | -11.25060195207487 | -1.23212147111865 | f |
| 3.54255281262430  | -6.99732888955450  | 2.34575849141478  | h |
| 4.42741187472805  | 6.55243530306214   | 2.13874263635651  | h |
| -6.79814474315788 | 3.96487313613823   | -2.22747534734546 | h |
| 6.77730760431110  | 3.77871070360254   | -2.56399481182065 | h |
| -0.17520764736003 | -7.88031243305589  | -2.16482839857035 | h |
| 0.75609355782928  | -3.36995631925744  | 0.05743977596401  | n |
| 2.54417316284356  | 2.34882663806816   | -0.07850197451969 | n |

FAI(N(C<sub>6</sub>H<sub>2</sub>F<sub>3</sub>)<sub>2</sub>)<sub>3</sub><sup>-</sup>, C<sub>1</sub>

|                   |                   |                   |    |
|-------------------|-------------------|-------------------|----|
| -4.31339339121768 | -2.77812958165447 | -0.39811907807515 | c  |
| -3.06766508069133 | -3.83850597657798 | -2.49045996719665 | c  |
| -3.71152052958770 | -6.24714846722011 | -3.31512212810783 | c  |
| -5.66699188648228 | -7.61651327710470 | -2.19502946634545 | c  |
| -6.96195253227280 | -6.50043073396252 | -0.17702668848312 | c  |
| -6.31770902018260 | -4.12880782990060 | 0.72541159265893  | c  |
| -1.50537713367783 | -2.86299301428734 | -3.40120422462186 | h  |
| -2.45658020762103 | -7.30095026158213 | -5.28294402467611 | f  |
| -6.29649276864067 | -9.94395636880275 | -3.03366933664563 | f  |
| -8.85652827565294 | -7.82687504132968 | 0.92939101259237  | f  |
| -7.30740792954067 | -3.36639694955142 | 2.36069999870219  | h  |
| -0.13405216075929 | -0.14446643289481 | 1.87527431523753  | al |
| -3.47670969018501 | -0.47066213765009 | 0.65749933487163  | n  |
| 4.08305297966650  | -1.92192722761117 | -0.99064494646219 | c  |
| -0.02842602543760 | 4.90754109075973  | -0.31767490396295 | c  |
| -5.26428447132816 | 1.42571663335983  | 1.11584263332312  | c  |
| 3.82405157710159  | 3.47557643646006  | 1.67068568035874  | c  |
| 1.54157438527173  | -5.24009499454995 | 0.84851295266303  | c  |
| 3.74335533486390  | -0.50084512234313 | -3.20653930826414 | c  |
| -1.59474082108629 | 4.30522117631162  | -2.38128489744163 | c  |
| -4.82064052401613 | 3.23745340848639  | 3.02563140519917  | c  |
| 4.84385172719318  | 2.36725972354291  | 3.87412268131455  | c  |
| -0.11424421799144 | -6.04527782197806 | 2.78710226122706  | c  |
| 5.83391872560714  | 0.40865958884462  | -4.51180841487052 | c  |
| -3.13303410257660 | 6.14589552384547  | -3.44551053557692 | c  |
| -6.38521896577782 | 5.32910178919836  | 3.22977666567527  | c  |

|                    |                    |                   |   |
|--------------------|--------------------|-------------------|---|
| 7.40172929748380   | 2.61901399807080   | 4.39568931246255  | c |
| -0.82064782396557  | -8.56170741596063  | 2.93732145182247  | c |
| 8.29193951765537   | -0.11387562722675  | -3.71522131677843 | c |
| -3.08415214612860  | 8.64742931200082   | -2.61398812135967 | c |
| -8.49374468959630  | 5.65892503392713   | 1.67547661692651  | c |
| 9.02348061983177   | 3.99756962972093   | 2.83724774663470  | c |
| 0.13161684430460   | -10.39405921230402 | 1.28861721353148  | c |
| 8.60715566473008   | -1.56790325876952  | -1.52885886848598 | c |
| -1.44765330639622  | 9.24964422121734   | -0.62578735391003 | c |
| -8.97398668779380  | 3.80106941938449   | -0.13865346006013 | c |
| 7.98152482944217   | 5.12967116889718   | 0.68899894616164  | c |
| 1.83269807488159   | -9.59245323455113  | -0.56143218787869 | c |
| 6.55442366402881   | -2.47096253422292  | -0.17419440339174 | c |
| 0.05731265729765   | 7.43982584852158   | 0.51916248515939  | c |
| -7.41394403888949  | 1.71919366038917   | -0.44197470298442 | c |
| 5.44605349121569   | 4.88675938191534   | 0.08544662682762  | c |
| 2.54162333428083   | -7.08098674314243  | -0.80968995292137 | c |
| 1.86478348766761   | -0.01983934227080  | -3.88834072055548 | h |
| -1.75191008806085  | 2.37461739229190   | -3.06894901749151 | h |
| -3.23861717822087  | 3.05184648630882   | 4.33348183610498  | h |
| 3.65475443732830   | 1.30982675530332   | 5.18335974993844  | h |
| -0.88093918028712  | -4.71644824377830  | 4.16341405663692  | h |
| 5.50755498186008   | 1.83792163033043   | -6.61416441965524 | f |
| -4.70065382412974  | 5.53164321538844   | -5.37715055397714 | f |
| -5.91323788654081  | 7.09811553934074   | 5.02491465797155  | f |
| 8.38044577189268   | 1.53377257478340   | 6.50516450794349  | f |
| -2.45578484083711  | -9.31335928024577  | 4.76554858818194  | f |
| 10.30874701880628  | 0.77911952221564   | -4.99712717242515 | f |
| -4.56136238402820  | 10.43079870070328  | -3.69311233941949 | f |
| -10.02883307417255 | 7.68964077332277   | 1.93478008595753  | f |
| 11.50693977121992  | 4.25079423489900   | 3.39445447262216  | f |
| -0.55104049051545  | -12.85285227813460 | 1.49667336331011  | f |
| 10.99232299091385  | -2.03918606416571  | -0.72028419433997 | f |
| -1.39658714488868  | 11.67481039583255  | 0.20917539350079  | f |
| -11.01385188268767 | 4.09724894076583   | -1.66803666427777 | f |
| 9.53996772996122   | 6.45172622470443   | -0.86306286301382 | f |
| 2.77853413418709   | -11.34251144644389 | -2.18471304040794 | f |
| 6.86756316877405   | -3.52330038861187  | 1.56585486526669  | h |
| 1.22796868310452   | 7.97814447502935   | 2.12350149574674  | h |

|                   |                   |                   |   |
|-------------------|-------------------|-------------------|---|
| -7.81344915990520 | 0.39258353943945  | -1.96287433695756 | h |
| 4.75528043740274  | 5.72076661483397  | -1.66375693541158 | h |
| 3.78798215501446  | -6.55689691716750 | -2.35975667164644 | h |
| 1.97664743509236  | -2.66107229458054 | 0.48821973380538  | n |
| 1.30319230465282  | 3.00491490851351  | 0.98199545135767  | n |
| -0.23868167096456 | -0.41842344828298 | 5.11971802638546  | f |

Ga(N(C<sub>6</sub>F<sub>5</sub>)<sub>2</sub>)<sub>3</sub>, D<sub>3</sub>

|                   |                   |                   |    |
|-------------------|-------------------|-------------------|----|
| -4.91585012313605 | -2.23090050545877 | -0.47932539750919 | c  |
| -4.34751115105735 | -3.77717667868902 | -2.55973343662083 | c  |
| -5.56763227000642 | -6.07599538745367 | -2.96558718994691 | c  |
| -7.49202606047071 | -6.84211117785723 | -1.32466745691271 | c  |
| -8.14394884973787 | -5.31489950550111 | 0.73191383200309  | c  |
| -6.84265644256761 | -3.05875376021457 | 1.15475782425205  | c  |
| -2.50861425620336 | -3.05794094187152 | -4.17936783951479 | f  |
| -4.91581737127722 | -7.54288274928041 | -4.92998437660793 | f  |
| -8.68768734186450 | -9.04121351891509 | -1.70957384474594 | f  |
| -9.96699316134037 | -6.05681788638206 | 2.32801295323332  | f  |
| -7.42933688753258 | -1.67591848638674 | 3.20725170571069  | f  |
| 0.00000000000000  | 0.00000000000000  | 0.00000000000000  | ga |
| -3.53619160708375 | 0.00000000000000  | 0.00000000000000  | n  |
| 4.38994157261085  | -3.14180083510331 | -0.47932539750919 | c  |
| 0.52590855052520  | 5.37270134056206  | -0.47932539750919 | c  |
| -4.91585012313605 | 2.23090050545877  | 0.47932539750919  | c  |
| 4.38994157261085  | 3.14180083510331  | 0.47932539750919  | c  |
| 0.52590855052520  | -5.37270134056206 | 0.47932539750919  | c  |
| 5.44488653385550  | -1.87646676070729 | -2.55973343662083 | c  |
| -1.09737538279815 | 5.65364343939631  | -2.55973343662083 | c  |
| -4.34751115105735 | 3.77717667868902  | 2.55973343662083  | c  |
| 5.44488653385550  | 1.87646676070729  | 2.55973343662083  | c  |
| -1.09737538279815 | -5.65364343939631 | 2.55973343662083  | c  |
| 8.04578249381516  | -1.78371329102875 | -2.96558718994691 | c  |
| -2.47815022380873 | 7.85970867848242  | -2.96558718994691 | c  |
| -5.56763227000642 | 6.07599538745367  | 2.96558718994691  | c  |
| 8.04578249381516  | 1.78371329102875  | 2.96558718994691  | c  |
| -2.47815022380873 | -7.85970867848242 | 2.96558718994691  | c  |
| 9.67145512577719  | -3.06722930525407 | -1.32466745691271 | c  |
| -2.17942906530647 | 9.90934048311130  | -1.32466745691271 | c  |
| -7.49202606047071 | 6.84211117785723  | 1.32466745691271  | c  |

|                   |                    |                   |   |
|-------------------|--------------------|-------------------|---|
| 9.67145512577719  | 3.06722930525407   | 1.32466745691271  | c |
| -2.17942906530647 | -9.90934048311130  | 1.32466745691271  | c |
| 8.67481241519425  | -4.39541683824350  | 0.73191383200309  | c |
| -0.53086356545638 | 9.71031634374461   | 0.73191383200309  | c |
| -8.14394884973787 | 5.31489950550111   | -0.73191383200309 | c |
| 8.67481241519425  | 4.39541683824350   | -0.73191383200309 | c |
| -0.53086356545638 | -9.71031634374461  | -0.73191383200309 | c |
| 6.07028668155080  | -4.39653742852551  | 1.15475782425205  | c |
| 0.77236976101682  | 7.45529118874009   | 1.15475782425205  | c |
| -6.84265644256761 | 3.05875376021457   | -1.15475782425205 | c |
| 6.07028668155080  | 4.39653742852551   | -1.15475782425205 | c |
| 0.77236976101682  | -7.45529118874009  | -1.15475782425205 | c |
| 3.90256166703492  | -0.64355320323216  | -4.17936783951479 | f |
| -1.39394741083156 | 3.70149414510367   | -4.17936783951479 | f |
| -2.50861425620336 | 3.05794094187152   | 4.17936783951479  | f |
| 3.90256166703492  | 0.64355320323216   | 4.17936783951479  | f |
| -1.39394741083156 | -3.70149414510367  | 4.17936783951479  | f |
| 8.99023676428286  | -0.48578134925070  | -4.92998437660793 | f |
| -4.07441939300564 | 8.02866409853112   | -4.92998437660793 | f |
| -4.91581737127722 | 7.54288274928041   | 4.92998437660793  | f |
| 8.99023676428286  | 0.48578134925070   | 4.92998437660793  | f |
| -4.07441939300564 | -8.02866409853112  | 4.92998437660793  | f |
| 12.17376425935202 | -3.00315117873362  | -1.70957384474594 | f |
| -3.48607691748750 | 12.04436469764870  | -1.70957384474594 | f |
| -8.68768734186450 | 9.04121351891509   | 1.70957384474594  | f |
| 12.17376425935202 | 3.00315117873362   | 1.70957384474594  | f |
| -3.48607691748750 | -12.04436469764870 | 1.70957384474594  | f |
| 10.22885473637301 | -5.60326033387551  | 2.32801295323332  | f |
| -0.26186157503264 | 11.66007822025756  | 2.32801295323332  | f |
| -9.96699316134037 | 6.05681788638206   | -2.32801295323332 | f |
| 10.22885473637301 | 5.60326033387551   | -2.32801295323332 | f |
| -0.26186157503264 | -11.66007822025756 | -2.32801295323332 | f |
| 5.16605642764918  | -5.59603523468266  | 3.20725170571069  | f |
| 2.26328045988340  | 7.27195372106941   | 3.20725170571069  | f |
| -7.42933688753258 | 1.67591848638674   | -3.20725170571069 | f |
| 5.16605642764918  | 5.59603523468266   | -3.20725170571069 | f |
| 2.26328045988340  | -7.27195372106941  | -3.20725170571069 | f |
| 1.76809580354186  | -3.06243176438385  | 0.00000000000000  | n |
| 1.76809580354186  | 3.06243176438385   | 0.00000000000000  | n |

FGa(N(C<sub>6</sub>F<sub>5</sub>)<sub>2</sub>)<sub>3</sub><sup>-</sup>, C<sub>3</sub>

|                   |                    |                   |    |
|-------------------|--------------------|-------------------|----|
| -4.69358661349006 | -1.85645601191411  | -0.17878885525076 | c  |
| -3.98864340787123 | -3.21269585337742  | -2.35292715890954 | c  |
| -5.13637061208747 | -5.49866047076651  | -2.99961559553227 | c  |
| -7.08117664157931 | -6.46725071893227  | -1.50530228793759 | c  |
| -7.86998319312562 | -5.13637348074538  | 0.63462725160692  | c  |
| -6.67709105375402 | -2.87524033511688  | 1.27583481310202  | c  |
| -2.18240701458799 | -2.30763077270493  | -3.88219481116864 | f  |
| -4.38891822655716 | -6.77032764190268  | -5.07784946046105 | f  |
| -8.18341690370828 | -8.68057567170946  | -2.11344502785843 | f  |
| -9.73916857762346 | -6.07506893377243  | 2.08973693536507  | f  |
| -7.44048679091229 | -1.65678770039926  | 3.37523817110678  | f  |
| 0.00000000000000  | 0.00000000000000   | 1.88407815164387  | ga |
| -3.45911291555942 | 0.38790769740897   | 0.57183467817219  | n  |
| 3.95453137407099  | -3.13653723618794  | -0.17878885525076 | c  |
| 0.73905523941908  | 4.99299324810201   | -0.17878885525076 | c  |
| -4.97428692332132 | 2.54426849479257   | 0.67820037270421  | c  |
| 4.69054461219940  | 3.03572459391269   | 0.67820037270421  | c  |
| 0.28374231112190  | -5.57999308870528  | 0.67820037270421  | c  |
| 4.77659792759337  | -1.84791859116511  | -2.35292715890954 | c  |
| -0.78795451972213 | 5.06061444454255   | -2.35292715890954 | c  |
| -4.68075096535637 | 4.42085963714937   | 2.55327522512652  | c  |
| 6.16895223501482  | 1.84321942621248   | 2.55327522512652  | c  |
| -1.48820126965845 | -6.26407906336184  | 2.55327522512652  | c  |
| 7.33016496051279  | -1.69889719793629  | -2.99961559553227 | c  |
| -2.19379434842535 | 7.19755766870280   | -2.99961559553227 | c  |
| -6.09338040081693 | 6.64368421535741   | 2.58516723839832  | c  |
| 8.80028950562968  | 1.95518011435095   | 2.58516723839832  | c  |
| -2.70690910481277 | -8.59886432970836  | 2.58516723839832  | c  |
| 9.14139173602820  | -2.89885350082650  | -1.50530228793759 | c  |
| -2.06021509444886 | 9.36610421975879   | -1.50530228793759 | c  |
| -7.93876647170914 | 7.07991846870333   | 0.75259513392557  | c  |
| 10.10077248647430 | 3.33521420486062   | 0.75259513392557  | c  |
| -2.16200601476512 | -10.41513267356393 | 0.75259513392557  | c  |
| 8.38322151421300  | -4.24741863223071  | 0.63462725160692  | c  |
| -0.51323832108733 | 9.38379211297604   | 0.63462725160692  | c  |
| -8.30816953492540 | 5.26453041428854   | -1.12310527686139 | c  |
| 8.71330184523238  | 4.56282066904908   | -1.12310527686139 | c  |

|                    |                    |                   |   |
|--------------------|--------------------|-------------------|---|
| -0.40513231030700  | -9.82735108333763  | -1.12310527686139 | c |
| 5.82857669907391   | -4.34491030837431  | 1.27583481310202  | c |
| 0.84851435468010   | 7.22015064349121   | 1.27583481310202  | c |
| -6.83644299302680  | 3.07793036862285   | -1.16967289841234 | c |
| 6.08378738682038   | 4.38156811917389   | -1.16967289841234 | c |
| 0.75265560620640   | -7.45949848779676  | -1.16967289841234 | c |
| 3.08967037901121   | -0.73620452967811  | -3.88219481116864 | f |
| -0.90726336442318  | 3.04383530238304   | -3.88219481116864 | f |
| -2.92837418122459  | 4.10706237627441   | 4.37371857939595  | f |
| 5.02100744339320   | 0.48251524458977   | 4.37371857939595  | f |
| -2.09263326216858  | -4.58957762086415  | 4.37371857939595  | f |
| 8.05773484311025   | -0.41575085837971  | -5.07784946046105 | f |
| -3.66881661655311  | 7.18607850028236   | -5.07784946046105 | f |
| -5.69320912400699  | 8.37432726292909   | 4.41349487184092  | f |
| 10.09898471130470  | 0.74330009898288   | 4.41349487184092  | f |
| -4.40577558729772  | -9.11762736191197  | 4.41349487184092  | f |
| 11.60930750302769  | -2.74675909251565  | -2.11344502785843 | f |
| -3.42589059931942  | 11.42733476422507  | -2.11344502785843 | f |
| -9.33136078649403  | 9.21598076453110   | 0.79090259030520  | f |
| 12.64695385611964  | 3.47320511071621   | 0.79090259030520  | f |
| -3.31559306962563  | -12.68918587524730 | 0.79090259030520  | f |
| 10.13074831520031  | -5.39683293307488  | 2.08973693536507  | f |
| -0.39157973757678  | 11.47190186684727  | 2.08973693536507  | f |
| -10.04818220907154 | 5.66537121089102   | -2.94379119429860 | f |
| 9.93044649503637   | 5.86929544946526   | -2.94379119429860 | f |
| 0.11773571403515   | -11.53466666035626 | -2.94379119429860 | f |
| 5.15506363267955   | -5.61525672725296  | 3.37523817110678  | f |
| 2.28542315823279   | 7.27204442765225   | 3.37523817110678  | f |
| -7.18998214543079  | 1.47771265366439   | -3.13411433428195 | f |
| 4.8747277028246    | 5.48785086386740   | -3.13411433428195 | f |
| 2.31525437514829   | -6.96556351753182  | -3.13411433428195 | f |
| 1.39361853750000   | -3.18963350813780  | 0.57183467817219  | n |
| 2.06549437805943   | 2.80172581072884   | 0.57183467817219  | n |
| 0.00000000000000   | 0.00000000000000   | 5.27446496812404  | f |

## References

---

- [1] Koppang, R. *Acta Chem. Scand.* **1971**, *25*, 3067-3071.
- [2] Khvorost, A.; Shutov, P. L.; Harms, K.; Lorberth, J.; Sundermeyer, J.; Karlov, S. S.; Zaitseva, G. S. *Z. Anorg. Allg. Chem.* **2004**, *630*, 885-889.
- [3] Altomare, A.; Cascarano, G.L.; Giacovazzo, C.; Guagliardi, A. *J. Appl. Cryst.* **1993**, *26*, 343-350.
- [4] Altomare, A.; Burla, M. C.; Camalli, M.; Cascarano, G.; Giacovazzo, C.; Guagliardi, A.; Moliterni, A. G. G.; Polidori, G.; Spagna, R. *Appl. Crystallogr.* **1999**, *32*, 115-119.
- [5] Burla, M. C.; Caliandro, R.; Camalli, M.; Carrozzini, B.; Cascarano, G. L.; De Caro, L.; Giacovazzo, C.; Polidori, G.; Spagna, R. *J. Appl. Crystallogr.* **2005**, *38*, 381-388.
- [6] Sheldrick, G. M. *Acta Crystallogr. Sect. A* **1990**, *46*, 467-473;
- [7] Sheldrick, G. *Acta Cryst. A* **2008**, *64*, 112-122.
- [8] Blessing, R. H., *Acta Cryst. A* **1995**, *51*, 33-38.
- [9] Coppens, P. (Eds.: F. R. Ahmed, S. R. Hall, P. C. Huber), Munksgaard, Copenhagen, **1970**, pp. 225-270.
- [10] Bruker, Bruker AXS Inc., Madison, Wisconsin, USA, **2012**.
- [11] Brandenburg, K.; Putz, H.: *Diamond - Crystal and Molecular Structure Visualization v3.2i*, Crystal Impact GbR, Bonn, Germany, 2012.
- [12] Ahlrichs, R.; Bär, M.; Häser, M.; Horn, H.; Kölmel, C. *Chem. Phys. Lett.* **1989**, *162*, 165-169.
- [13] Treutler, O.; Ahlrichs, R. *J. Chem. Phys.* **1995**, *102*, 346-354.
- [14] Becke, A. D. *Phys. Rev. A* **1988**, *38*, 3098-3100.
- [15] Perdew, J. P. *Phys. Rev. B* **1986**, *33*, 8822-8824.
- [16] Perdew, J. P. *Phys. Rev. B* **1986**, *34*, 7406.
- [17] Schäfer, A.; Horn, H.; Ahlrichs, R. *J. Chem. Phys.* **1992**, *97*, 2571-2577.
- [18] Eichkorn, K.; Treutler, O.; Öhm, H.; Häser, M.; Ahlrichs, R. *Chem. Phys. Lett.* **1995**, *240*, 283-290.
- [19] Eichkorn, K.; Treutler, O.; Öhm, H.; Häser, M.; Ahlrichs, R. *Chem. Phys. Lett.* **1995**, *242*, 652-660.
- [20] Eichkorn, K.; Weigend, F.; Treutler, O.; Ahlrichs, R. *Theor. Chem. Acc.* **1997**, *97*, 119-124.
- [21] Grimme, S.; Antony, J.; Ehrlich, S.; Krieg, H. *J. Chem. Phys.* **2010**, *132*, 154104.
- [22] Deglmann, P.; Furche, F.; Ahlrichs, R. *Chem. Phys. Lett.* **2002**, *362*, 511-518.
- [23] Deglmann, P.; Furche, F. *J. Chem. Phys.* **2002**, *117*, 9535-9538.
- [24] By chance scaling factors for BP86/def-TZVP frequencies are very close to unity. Therefore we did not scale the contributions to entropy/enthalpy.
- [25] Dunning, T. H. *J. Chem. Phys.* **1989**, *90*, 1007-1023.
- [26] Dunning, T. H.; Peterson, K. A.; Wilson, A. K. *J. Chem. Phys.* **2001**, *114*, 9244-9253.
- [27] DeYonker, N. J.; Peterson, K. A.; Wilson, A. K. *J. Phys. Chem. A* **2007**, *111*, 11383-11393.
- [28] Kendall, R.; Dunning, T. H.; Harrison, R. J. *J. Chem. Phys.* **1992**, *96*, 6796-6806.
